# Supplementary material for: Novel Organochlorinated Xerogels: From Microporous Materials to Ordered Domains
Source: MDPI journal article supplement (doi:10.3390/polym13091415), 2021-04-27
Supplement: s1 [file s1]

## SUPPLEMENTARY MATERIALS

### **Novel Organochlorinated Xerogels: from Microporous Materials to Ordered Domains**

**Table S1.** Gelation time of CIRTEOS:TEOS materials

| RTEOS   | RTEOS (%) | $t_g$ (h) |
|---------|-----------|-----------|
| CIMTEOS | 5         | 6         |
|         | 15        | 8         |
|         | 25        | 11        |
| CIETEOS | 5         | 141       |
|         | 15        | 357       |
|         | 25        | 815       |
| CIPTEOS | 5         | 13        |
|         | 15        | 1199      |
|         | 25        | 4769      |

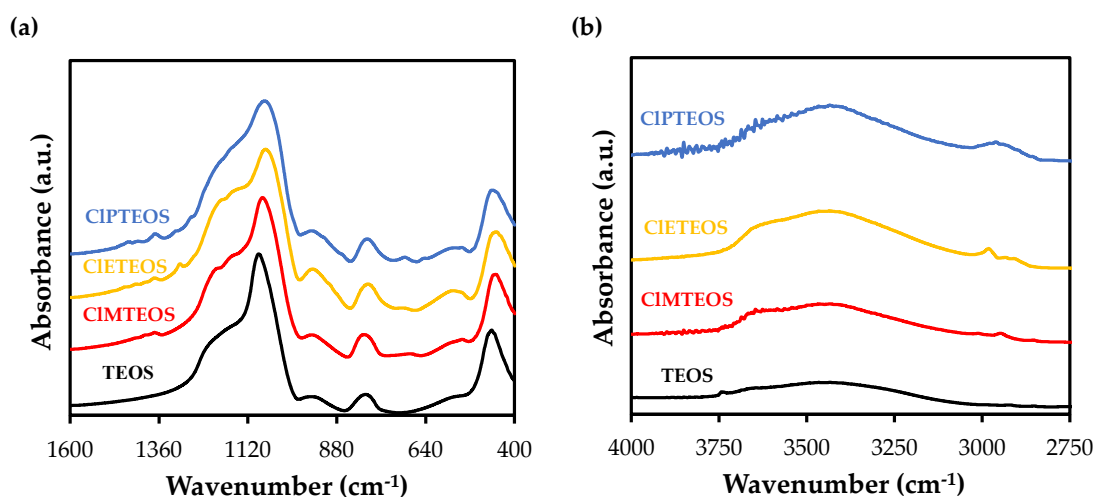**Figure S1.** FTIR spectra of xerogels synthesised with 15% precursor within the range of (a) 1600–400 cm<sup>-1</sup> and (b) 4000–2750 cm<sup>-1</sup>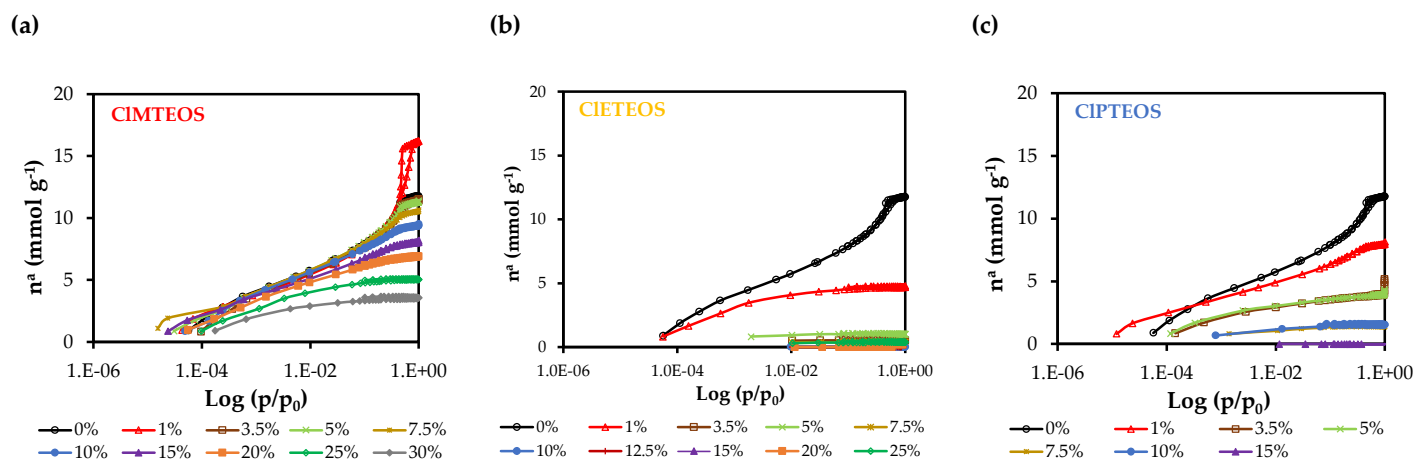**Figure S2.** N<sub>2</sub> adsorption isotherms at -196 °C on a semi-logarithmic scale of the reference material and hybrids (a) CIMTEOS:TEOS, (b) CIETEOS:TEOS, and (c) CIPTEOS:TEOS

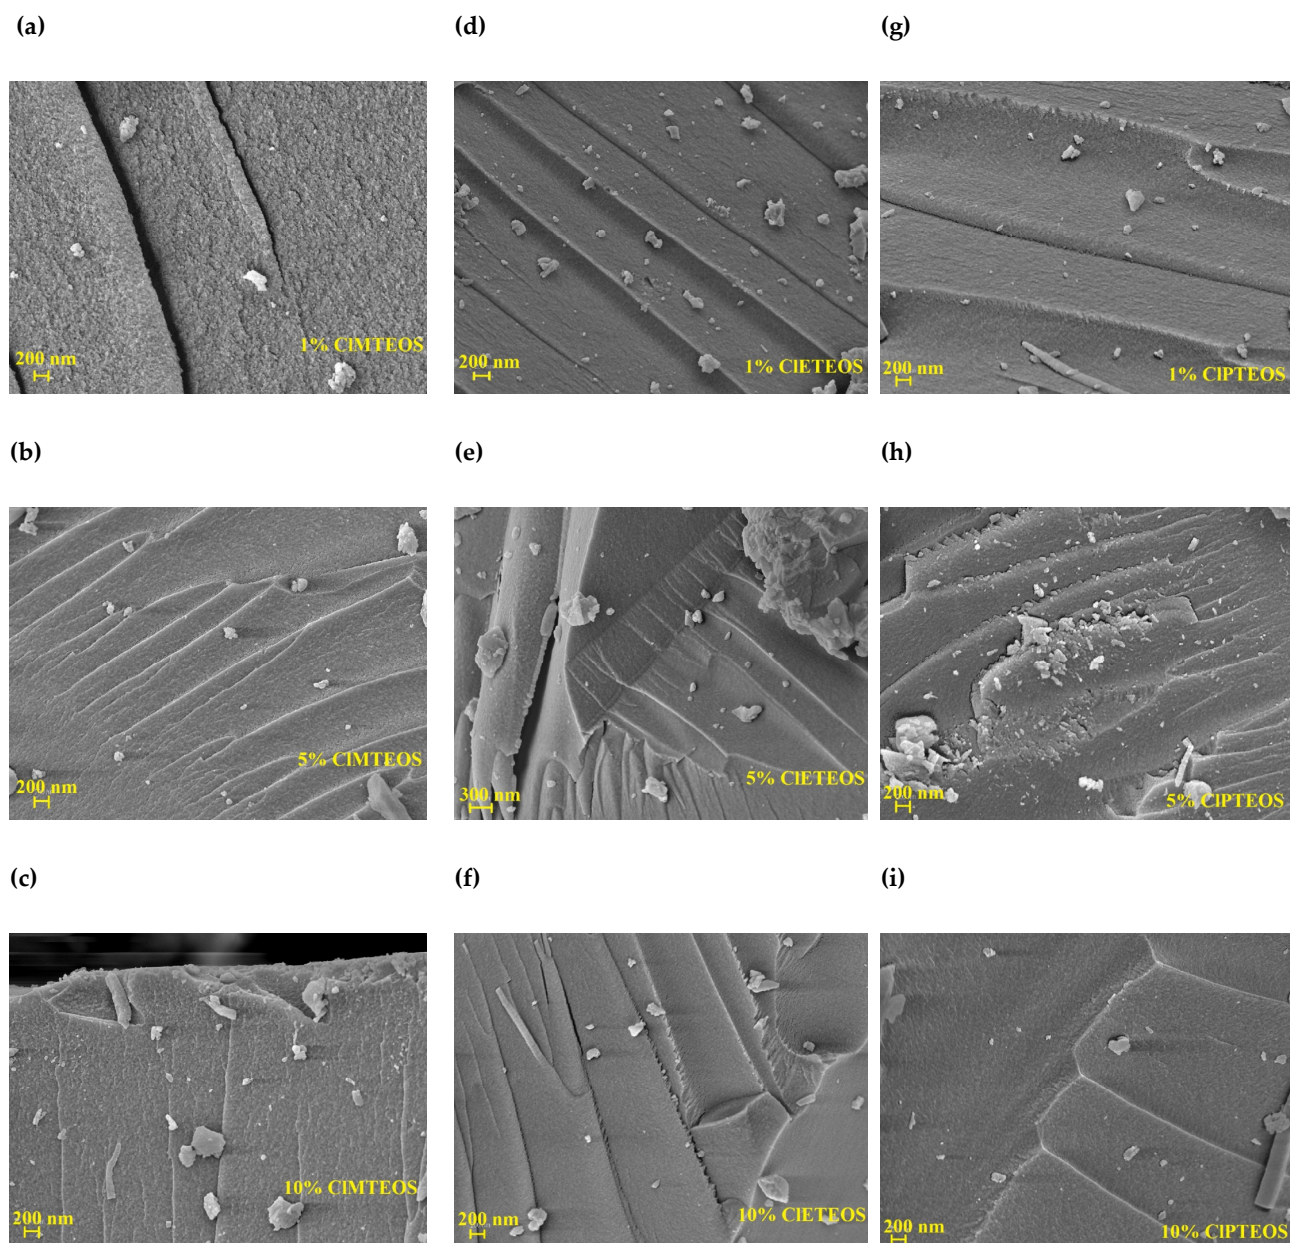

**Figure S3.** FE-SEM micrographs of (a-c) CIMTEOS:TEOS materials, (d-f) CIETEOS:TEOS materials, and (g-i) CIPTEOS:TEOS materials

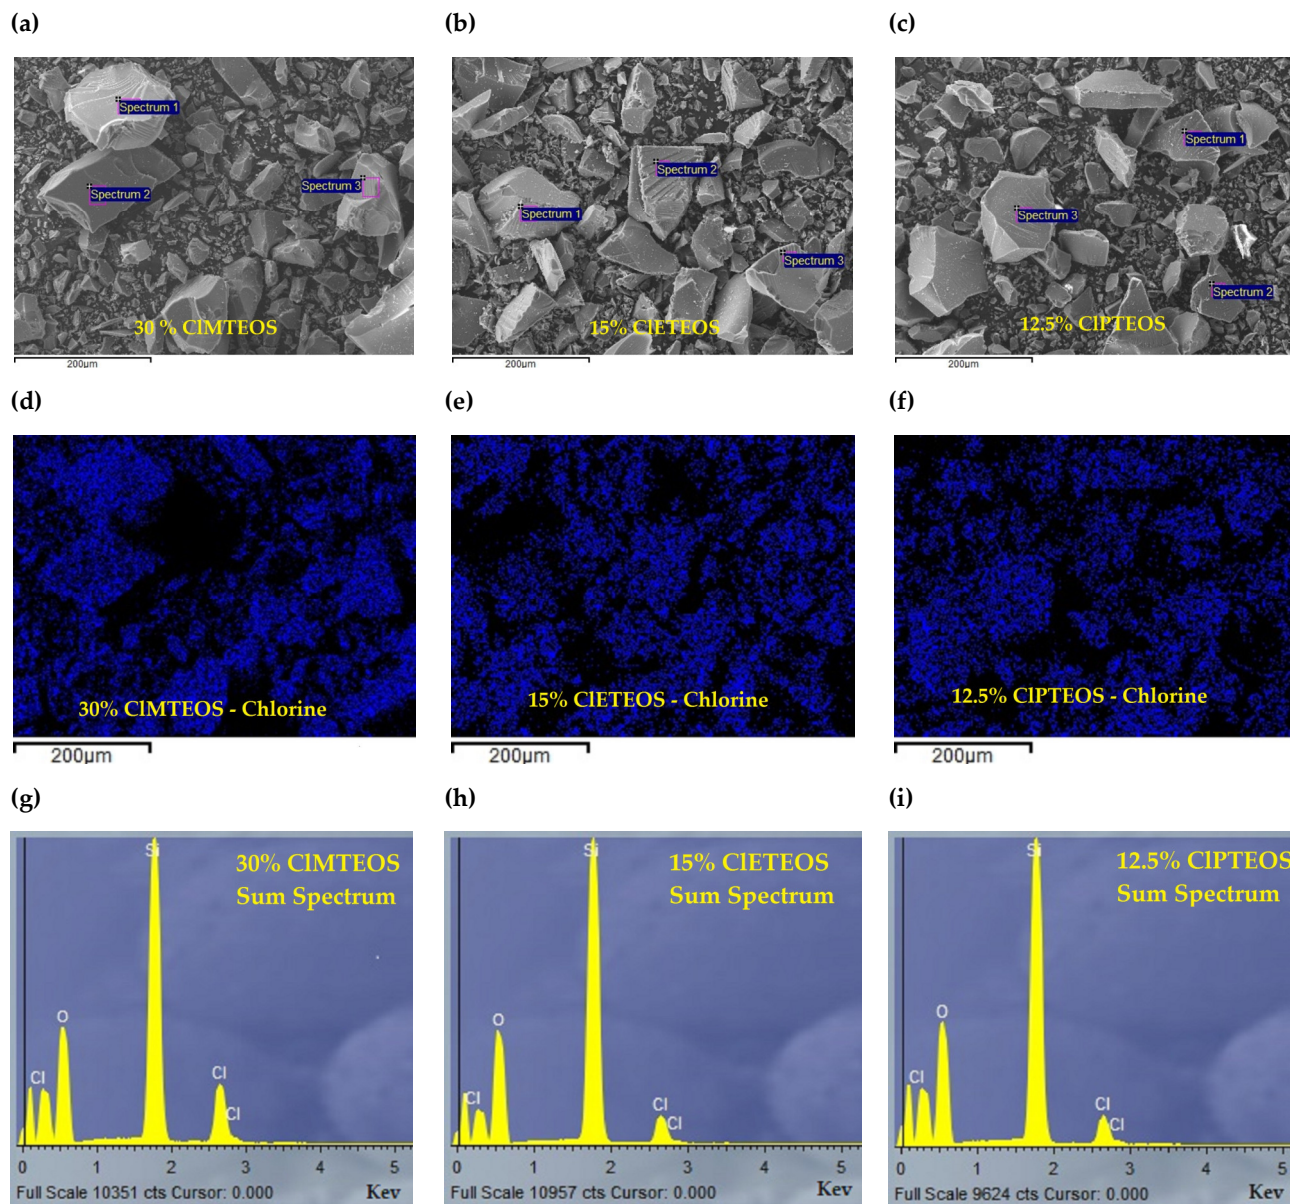

**Figure S4.** SEM micrographs of the chloroalkyl materials, (a-c) Distribution of chlorine atoms on the surface of xerogels obtained by applying EDX, (d-f) Sum of EDX spectra obtained by analyzing different points of the micrographs (g-i)
